1           **Low frequency of pathogenic allelic variants in the 46,XY differences of sex**  
2           **development (DSD)-related genes in small for gestational age children with hypospadias**

3   Barbara L. Braga<sup>1</sup>, Nathalia L. Gomes<sup>1</sup>, Mirian Yumie Nishi<sup>1</sup>, Bruna Lucheze Freire<sup>1</sup>, Rafael  
4   Loch Batista<sup>1</sup>, Antonio Marcondes Lerario<sup>2</sup>, Mariana Ferreira de Assis Funari<sup>1</sup>, Elaine Maria  
5   Frade Costa<sup>3</sup>, Sorahia Domenice<sup>1</sup>, José Antonio D. Faria Junior<sup>1</sup>, Alexander Augusto Lima  
6   Jorge<sup>1,3</sup>, Berenice Bilharinho Mendonca<sup>1</sup>.

7

8   <sup>1</sup>Unidade de Endocrinologia do Desenvolvimento LIM/42, SELA, Hospital das Clínicas,  
9   Disciplina de endocrinologia da FMUSP, Sao Paulo, Brazil

10   <sup>2</sup>University of Michigan, Ann Arbor, MI, USA,

11   <sup>3</sup>Unidade de Endocrinologia Genética, Laboratório de Endocrinologia Celular e Molecular  
12   LIM25, Disciplina de Endocrinologia da Faculdade de Medicina da Universidade de São  
13   Paulo, São Paulo CEP, Brazil.

14

15 **Abstract**

16 **Background:** Hypospadias is a congenital disorder of male genital formation where the  
17 urinary opening is not on the head of the penis and genetic factors play an important role in  
18 the incidence of this early developmental defect in 46,XY individuals, in both isolated and  
19 syndromic forms. Children born small for gestational age (SGA) present a high frequency of  
20 hypospadias of undetermined etiology, ranging from 15 to 30%, but the detection of  
21 hypospadias' etiology remains low. **Patients and methods:** from a cohort of 46,XY DSD  
22 patients, we identified 25 SGA children with medium or proximal hypospadias; four of them  
23 with associated syndromic characteristics. DNA samples from subjects were studied by  
24 massively parallel targeted sequencing (MPTS) using a targeted panel. MLPA was used for  
25 molecular diagnosis in two children with clinical phenotype of Silver Russel syndrome.  
26 **Results:** Loss of DNA methylation (11p15 LOM) at ICR1 was identified in two out of four  
27 syndromic children. The other syndromic patient had 3M syndrome phenotype and two novel  
28 likely-pathogenic variants in compound heterozygous state were found in *CUL7* gene. The  
29 last syndromic subject had Mulibrey nanism and, a homozygous variant in *TRIM37* was  
30 identified in the patient and confirmed in heterozygous state in the mother. Among non-  
31 syndromic children seven rare heterozygous variants with uncertain significance in six DSD-  
32 related genes were identified: two children had *DHX37* variants associated with *GATA4*  
33 and *WWOX* variants, respectively; three children had heterozygous variants, in *WT1*, *IGF1R*,  
34 and *BMP8B* genes. **Conclusion:** Pathogenic or likely-pathogenic variants in DSD-related  
35 genes were not identified in non-syndromic SGA children with hypospadias, suggesting that  
36 multi-factorial causes, unknown genes or unidentified environmental factors (epigenetic  
37 defects), may be involved in the etiology of this condition.

38

39

## 40 **Introduction**

41           The child born small for gestational age (SGA) is defined as the one with birth weight  
42 and/or length 2 or more standard deviation (SD) below the population mean for gestational  
43 age. Approximately 10-15% of them do not recover growth in postnatal life. The underlying  
44 causes of pre and postnatal growth retardation are diverse including known genetic  
45 syndromes, such as Silver-Russell syndrome (SRS). However, hypospadias are presented  
46 even in cases that cannot be categorized in a particular syndrome (1,2). SRS is a clinical and  
47 (epi)genetic heterogeneous syndrome characterized primarily by pre and postnatal growth  
48 retardation. The most common molecular mechanisms are loss of methylation on  
49 chromosome 11p15 (11p15 LOM), occurring in 30-60% of patients. Some genotype-  
50 phenotype studies showed 11p15 LOM patients presenting more typical and severe  
51 presentations (3,4,5). Among the variable signs in patients with SRS, male genital  
52 abnormalities are presented in about 40% of the male patients with this syndrome (6). It is  
53 interesting to note that SGA patients also present a high frequency of genital atypia of  
54 undetermined etiology, ranging from 15 to 30% (7). Genetic factors play an important role in  
55 the incidence of hypospadias, but the detection of hypospadias' etiology remains low (8). Our  
56 aim is to investigate the genetic cause underlining hypospadias in syndromic and non-  
57 syndromic SGA children.

58

## 59 **Materials and methods**

60           Within a cohort of 272 subjects with 46,XY differences of sex development (DSD)  
61 followed in Clinical Hospital of University of São Paulo 59 have 46,XY DSD due to  
62 unknown cause. Among them, 30 are SGA children with medium or proximal hypospadias  
63 and were invited to participate in the study and 25 agreed to participate. Four of them had

64 associated syndromic characteristics. This study was approved by the local medical ethics  
65 committee and patients and/or guardians gave their informed written consent. All patients  
66 have 46,XY karyotype in at least 30 analyzed cells obtained from peripheral blood. DNA  
67 samples from subjects and their families were obtained from peripheral blood leukocytes and  
68 were studied by massively parallel targeted sequencing (MPTS) using a targeted panel.

69 Two versions of the custom panel of target genes were designed using the *Agilent*  
70 *SureDesign 2.0 tool* (Agilent Technologies, Santa Clara, CA, USA) (Table 1). Genes that  
71 participate in the process of sex development and growth were included. Exonic regions of the  
72 target genes were included, including an area up to 25 bp before and after each exon.

73 The panel-based sequencing was performed in the Illumina MiSEQ platform  
74 (Illumina, Inc., San Diego, CA, USA). Paired-end reads were aligned to the hg19 assembly of  
75 the human genome with BWA-MEM. Variants were called and annotated with Platypus and  
76 ANNOVAR. Sanger sequencing was used to segregate the variants in the family. Multiplex  
77 Ligation-dependent Probe Amplification specific for Silver-Russel and Beckwith-Wideman  
78 syndromes (SALSA MLPA ME030 BWS/RSS) (MRC-Holland, Amsterdam, Netherlands)  
79 was used for molecular diagnosis in both children with SRS phenotype. The identified  
80 variants were classified according to American College of Medical Genetics (ACMG) criteria  
81 (9).

82 The targeted panel sequencing data were screened for rare variants (minor allele  
83 frequency < 0.1% in the public databases: Genome Aggregation Database (gnomAD) (10,11),  
84 1000 Genomes (12), and in the Brazilian population database (ABraOM) (13), located in  
85 exonic and consensus splice site regions. Subsequently, the filtration pipeline prioritized  
86 potentially pathogenic candidate variants (loss of function variants and variants classified as  
87 pathogenic by at least three *in silico* programs).

88           The sequencing reads carrying candidate variants were visually confirmed using the  
89 Integrative Genomics Viewer (Broad Institute, Cambridge, MA). Candidate variants were  
90 segregated in the available family members by Sanger method.

91

## 92 **Results**

93           **Syndromic SGA children:** The 11p15 LOM was identified in two clinical SRS  
94 children by MLPA, confirming the clinical diagnosis of SRS. The other syndromic patient has  
95 3M syndrome phenotype, and presents two likely pathogenic variants (p.Trp1622\* and  
96 p.Gln897Hisfs\*23) in compound heterozygosis state in *CUL7* gene. Sanger sequencing  
97 confirmed the heterozygous p.Gln813fs variant in his mother. The child is a SGA boy, born  
98 from non-consanguineous parents, with disproportionate short stature, proximal hypospadias,  
99 unusual facial features (hypoplastic midface; short, broad neck). The last syndromic subject is  
100 a SGA child, born from consanguineous parents, with triangular face, hypoplastic midface,  
101 frontal bossing, short stature, proximal hypospadias, feeding difficulties, and early respiratory  
102 distress. The homozygous p.Tyr341Ilefs\*16 variant in *TRIM37* was identified in the patient.  
103 Sanger sequencing confirmed the heterozygous p.Tyr341Ilefs\*16 variant in his mother (Table  
104 2).

105           **Non-syndromic SGA children:** Seven rare heterozygous variants with uncertain  
106 significance in six DSD-related genes were identified in five patients: *DHX37* variants (p.  
107 Val717Ile and p.Ala737Thr) were found associated with *GATA4* p.Pro407Arg and with  
108 *WWOX* p.Tyr85Asp, respectively, in two children; three children each have heterozygous  
109 variants, the *WT1* p.Cys350Arg, the *IGF1R* p.Arg1337Cys, and the *BMP8B* p.Arg116Cys  
110 variant (Table 3). Sanger sequencing confirmed the occurrence of the heterozygous variant  
111 *BMP8B* p.Arg116Cys in the patient's mother.

112

113 **Discussion**

114 SGA patients present a high frequency of hypospadias without a known etiology (8).  
115 Some studies believe that this low diagnosis could be explained because this condition has yet  
116 unknown genes and/or environmental factors involved (14, 15, 16). The present study  
117 investigated a possible molecular cause of hypospadias in syndromic and non-syndromic  
118 children.

119 In the syndromic SGA patients with hypospadias, the molecular diagnosis confirmed  
120 the clinical phenotype. Defects in *CUL7* gene are a known cause of 3M syndrome type 1,  
121 confirming the clinical features of the patient. The protein encoded by *CUL7* interacts with  
122 *TP53*, *CUL9*, and *FBXW8* proteins. *TRIM37* encodes a protein of the tripartite motif (TRIM)  
123 family, whose members are involved in diverse cellular functions such as developmental  
124 patterning and oncogenesis; mutations in *TRIM37* are associated with Mulibrey nanism, a  
125 serious autosomal recessive disorder. No defect in other gene associated with 46,XY DSD  
126 diagnosis was identified in the syndromic children.

127 SRS patients are characterized by a large spectrum of features and signs, varying from  
128 complex to milder phenotypes. Several clinical scoring systems have been proposed in the last  
129 few years. The First International Consensus Statement on diagnosis and management of SRS  
130 indicated the use of the Netchine-Harbison clinical scoring system (NH-CSS) for SRS clinical  
131 diagnosis. The most common molecular mechanisms are loss of methylation on chromosome  
132 11p15 (11p15 LOM), occurring in 30-60% of patients, and maternal uniparental disomy for  
133 chromosome 7 (upd(7)mat), occurring in 5-10% of patients (3, 4, 5). Among the variable  
134 signs in patients with SRS, male genital abnormalities are presented in about 40% of the male  
135 patients with this syndrome (6). It is interesting to note that SGA patients also present a high  
136 frequency of genital atypia, ranging from 15 to 30%, of undetermined etiology (7). We

137 hypothesized that genital atypia in SRS is not directly related to the epigenetic cause of the  
138 syndrome but it could share the same genetic mechanism of hypospadias in SGA children.

139 Studies of methylation role in specific disorders, as well as its influence on phenotypes  
140 would be helpful to increase our understanding about external genitalia development,  
141 contributing to expand the molecular etiology of hypospadias.

142 In non-syndromic SGA children, seven rare heterozygous variants with uncertain  
143 significance in six DSD-related genes were identified in these patients. The causes of  
144 hypospadias could be attributed to defects in genetic factors or considered syndrome-  
145 associated hypospadias (14, 17, 18). However, the association of these variants of uncertain  
146 significance with the phenotype could not be established in the absence of functional studies.

147

## 148 **Conclusion**

149 In conclusion no proven genetic defects clarify the etiology of hypospadias in  
150 syndromic and non-syndromic SGA children, suggesting that multi-factorial causes, unknown  
151 genes or unidentified epigenetic defects, may be involved in the etiology of this condition.

152

## 153 **References**

- 154 1. LEE, P. A., et al. International Small for Gestational Age Advisory Board consensus  
155 development conference statement: management of short children born small for  
156 gestational age, april. 2001. *Pediatrics* 111.6 (2003): 1253-1261.
- 157 2. CLAYTON, P. E. et al. Management of the Child Born Small for Gestational Age  
158 through to Adulthood: A Consensus Statement of the International Societies of  
159 Pediatric Endocrinology and the Growth Hormone Research Society. *The Journal Of*  
160 *Clinical Endocrinology & Metabolism*, [s.l.], v. 92, n. 3, p.804-810, mar. 2007. The  
161 Endocrine Society. <http://dx.doi.org/10.1210/jc.2006-2017>.
- 162 3. BARTHOLDI, D et al. Epigenetic mutations of the imprinted IGF2-H19 domain in  
163 Silver-Russell syndrome (SRS): results from a large cohort of patients with SRS and  
164 SRS-like phenotypes. *Journal Of Medical Genetics*, [s.l.], v. 46, n. 3, p.192-197, 18  
165 mar. 2009. *BMJ*. <http://dx.doi.org/10.1136/jmg.2008.061820>.

- 166 4. BRUCE, Sara et al. Clinically Distinct Epigenetic Subgroups in Silver-Russell  
167 Syndrome: The Degree of H19 Hypomethylation Associates with Phenotype Severity  
168 and Genital and Skeletal Anomalies. *The Journal Of Clinical Endocrinology &  
169 Metabolism*, [s.l.], v. 94, n. 2, p.579-587, fev. 2009. The Endocrine Society.  
170 <http://dx.doi.org/10.1210/jc.2008-1805>.
- 171 5. EGGERMANN, T. et al. Broad Clinical Spectrum in Silver-Russell Syndrome and  
172 Consequences for Genetic Testing in Growth Retardation. *Pediatrics*, [s.l.], v. 123, n.  
173 5, p.929-931, 13 abr. 2009. American Academy of Pediatrics (AAP).  
174 <http://dx.doi.org/10.1542/peds.2008-3228>.
- 175 6. Wakeling EL, Brioude F, Lokulo-Sodipe O, O'Connell SM, Salem J, Bliet J, Canton  
176 AP, Chrzanowska KH, Davies JH, Dias RP, Dubern B. Diagnosis and management of  
177 Silver–Russell syndrome: first international consensus statement. *Nature Reviews  
178 Endocrinology*. 2017 Feb;13(2):105.
- 179 7. MOREL, Y et al. Aetiological diagnosis of male sex ambiguity: a collaborative  
180 study. *European Journal Pediatric*, [s. L.], v. 161, n. 1, p.49-59, jan. 2002.
- 181 8. KALFA, Nicolas; PHILIBERT, Pascal; SULTAN, Charles. Is hypospadias a genetic,  
182 endocrine or environmental disease, or still an unexplained  
183 malformation? *International Journal Of Andrology*, [s.l.], v. 32, n. 3, p.187-197, jun.  
184 2009. Wiley. <http://dx.doi.org/10.1111/j.1365-2605.2008.00899.x>.
- 185 9. Richards S, Aziz N, Bale S, Bick D, Das S, Gastier-Foster J, Grody WW, Hegde M,  
186 Lyon E, Spector E, Voelkerding K, Rehm HL, Committee ALQA. Standards and  
187 guidelines for the interpretation of sequence variants: a joint consensus  
188 recommendation of the American College of Medical Genetics and Genomics and the  
189 Association for Molecular Pathology. *Genet Med*. 2015;17(5):405-424
- 190 10. Brownstein CA, Beggs AH, Homer N, Merriman B, Yu TW, Flannery KC, Dechene  
191 ET, Towne MC, Savage SK, Price EN, Holm IA, Luquette LJ, Lyon E, Majzoub J,  
192 Neupert P, McCallie D, Jr., Szolovits P, Willard HF, Mendelsohn NJ, Temme R,  
193 Finkel RS, Yum SW, Medne L, Sunyaev SR, Adzhubey I, Cassa CA, de Bakker PI,  
194 Duzkale H, Dworzy Ski P, Fairbrother W, Francioli L, Funke BH, Giovanni MA,  
195 Handsaker RE, Lage K, Lebo MS, Lek M, Leshchiner I, Macarthur DG, McLaughlin  
196 HM, Murray MF, Pers TH, Polak PP, Raychaudhuri S, Rehm HL, Soemedi R, Stitzel  
197 NO, Vestrecka S, Supper J, Gugenmus C, Klocke B, Hahn A, Schubach M, Menzel M,  
198 Biskup S, Freisinger P, Deng M, Braun M, Perner S, Smith RJ, Andorf JL, Huang J,  
199 Ryckman K, Sheffield VC, Stone EM, Bair T, Black-Ziegelbein EA, Braun TA,  
200 Darbro B, Deluca AP, Kolbe DL, Scheetz TE, Shearer AE, Sompallae R, Wang K,  
201 Bassuk AG, Edens E, Mathews K, Moore SA, Shchelochkov OA, Trapane P, Bossler  
202 A, Campbell CA, Heusel JW, Kwitek A, Maga T, Panzer K, Wassink T, Van Daele D,  
203 Azaiez H, Booth K, Meyer N, Segal MM, Williams MS, Tromp G, White P,  
204 Corsmeier D, Fitzgerald-Butt S, Herman G, Lamb-Thrush D, McBride KL, Newsom  
205 D, Pierson CR, Rakowsky AT, Maver A, Lovre IL, Palanda IA, Peterlin B, Torkamani  
206 A, Wedell A, Huss M, Alexeyenko A, Lindvall JM, Magnusson M, Nilsson D,  
207 Stranneheim H, Taylan F, Gilissen C, Hoischen A, van Bon B, Yntema H, Nelen M,  
208 Zhang W, Sager J, Zhang L, Blair K, Kural D, Cariaso M, Lennon GG, Javed A,  
209 Agrawal S, Ng PC, Sandhu KS, Krishna S, Veeramachaneni V, Isakov O, Halperin E,  
210 Friedman E, Shomron N, Glusman G, Roach JC, Caballero J, Cox HC, Mauldin D,  
211 Ament SA, Rowen L, Richards DR, Lucas FA, Gonzalez-Garay ML, Caskey CT, Bai  
212 Y, Huang Y, Fang F, Zhang Y, Wang Z, Barrera J, Garcia-Lobo JM, Gonzalez-



- 213 Lamuno D, Llorca J, Rodriguez MC, Varela I, Reese MG, De La Vega FM, Kiruluta  
214 E, Cargill M, Hart RK, Sorenson JM, Lyon GJ, Stevenson DA, Bray BE, Moore BM,  
215 Eilbeck K, Yandell M, Zhao H, Hou L, Chen X, Yan X, Chen M, Li C, Yang C, Gunel  
216 M, Li P, Kong Y, Alexander AC, Albertyn ZI, Boycott KM, Bulman DE, Gordon PM,  
217 Innes AM, Knoppers BM, Majewski J, Marshall CR, Parboosingh JS, Sawyer SL,  
218 Samuels ME, Schwartzenruber J, Kohane IS, Margulies DM. An international effort  
219 towards developing standards for best practices in analysis, interpretation and  
220 reporting of clinical genome sequencing results in the CLARITY Challenge. *Genome*  
221 *Biol.*15(3):R53.
- 222 11. <http://gnomad.broadinstitute.org/>.
- 223 12. Auton A, Brooks LD, Durbin RM, Garrison EP, Kang HM, Korbel JO, Marchini JL,  
224 McCarthy S, McVean GA, Abecasis GR, Consortium GP. A global reference for  
225 human genetic variation. *Nature*. 2015;526(7571):68-74.
- 226 13. Naslavsky MS, Yamamoto GL, de Almeida TF, Ezquina SAM, Sunaga DY, Pho N,  
227 Bozoklian D, Sandberg TOM, Brito LA, Lazar M, Bernardo DV, Amaro E, Duarte  
228 YAO, Lebrão ML, Passos-Bueno MR, Zatz M. Exomic variants of an elderly cohort  
229 of Brazilians in the ABraOM database. *Hum Mutat*. 2017;38(7):751-763.
- 230 14. Baskin LS, Ebberts MB. Hypospadias: anatomy, etiology, and technique. *Journal of*  
231 *pediatric surgery*. 2006 Mar 1;41(3):463-72.
- 232 15. Bouty A, Ayers KL, Pask A, Heloury Y, Sinclair AH. The genetic and environmental  
233 factors underlying hypospadias. *Sexual Development*. 2015;9(5):239-59.
- 234 16. Joodi M, Amerizadeh F, Hassanian SM, Erfani M, Ghayour-Mobarhan M, Ferns GA,  
235 Khazaei M, Avan A. The genetic factors contributing to hypospadias and their clinical  
236 utility in its diagnosis. *Journal of cellular physiology*. 2019 May;234(5):5519-23.
- 237 17. Van der Horst HJ, De Wall LL. Hypospadias, all there is to know. *European journal of*  
238 *pediatrics*. 2017 Apr 1;176(4):435-41.
- 239 18. MANSON JM, CARR MC. Molecular epidemiology of hypospadias: review of  
240 genetic and environmental risk factors. *Birth Defects Research Part A: Clinical and*  
241 *Molecular Teratology*. 2003 Oct;67(10):825-36.
- 242

Table 1. Genes included in both custom panels.

| Target genes |       |               |         |          |         |              |         |        |         |        |               |
|--------------|-------|---------------|---------|----------|---------|--------------|---------|--------|---------|--------|---------------|
| ACBD7        | ARX   | BMP15         | CYP11A1 | DND1     | FST     | HNF1B        | KATNBL1 | NANOS3 | POR     | SOX10  | SUPT3H        |
| ACVR1B       | ATRX  | <b>BMP8B*</b> | CYP17A1 | ESR1     | GADD45G | HPGDS        | LEF1    | NCOA1  | PRKACG  | SOX13  | TCF21         |
| ACVRL1       | BBS1  | BMPR1B        | CYP19A1 | FAM189A2 | GATA4   | HSD11B1      | LGR5    | NCOA2  | PTGDS   | SOX7   | TRIM32        |
| AKR1C2       | BBS10 | CAMK1D        | CYP26B1 | FBLN2    | GATA6   | HSD17B3      | LHCGR   | NCOA3  | PUM2    | SOX9   | <b>TRIM37</b> |
| AKR1C3       | BBS12 | CBLN1         | DHCR7   | FGD1     | GDF9    | HSD3B2       | LHX1    | NR0B1  | RSPO1   | SRA1   | UBE3A         |
| AKR1C4       | BBS2  | CHD7          | DHH     | FGF9     | GDNF    | <b>IGF1R</b> | MAMLD1  | NR3C1  | RSPO2   | SRD5A2 | USP34         |
| AMH          | BBS4  | CITED2        | DHX37   | FGFR2    | GPR56   | IHH          | MAP3K1  | NR5A1  | SIX1    | SRY    | WT1           |
| AMHR2        | BBS5  | CITED4        | DMRT1   | FOXL2    | GPR83   | INHBB        | MKKS    | PAPPA  | SIX4    | STAG3  | WWOX          |
| AR           | BBS7  | CTNNB1        | DMRT2   | FRAT1    | GTF2F1  | IRX3         | MSX1    | PDGFA  | SMAD4   | STAR   | ZFPM2         |
| ARL6         | BBS9  | <b>CUL7</b>   | DNAJC15 | FSHR     | HHAT    | KATNAL1      | NANOS2  | PDGFRB | SMARCE1 | STIM1  |               |

\*In bold, genes included only in the second version of the panel with significant variants.

Table 2. Variants found in syndromic children with hypospadias

| Syndromic subject | Phenotype                                                                                                                                                                                          | Diagnosis               | Gene           | Variant                  | Protein                         |
|-------------------|----------------------------------------------------------------------------------------------------------------------------------------------------------------------------------------------------|-------------------------|----------------|--------------------------|---------------------------------|
| 1                 | Growth failure, feeding difficulties, body asymmetry, protuding forehead, hypospadias                                                                                                              | Silver-Russell syndrome | <i>H19</i> DMR | 11p15 LOM                | -                               |
| 2                 | Growth failure, feeding difficulties, body asymmetry, protuding forehead, hypospadias                                                                                                              | Silver-Russell syndrome | <i>H19</i> DMR | 11p15 LOM                | -                               |
| 3                 | Proximal hypospadias, ocular hypertelorism, short nasal base, short neck, low cartilage ear pavement, small hands, single palmar fold, clinodactyly; difficulty growing and weight gain from birth | 3M syndrome             | <i>CUL7</i>    | c.4866G>A and c.2691delA | p.Trp1622* and p.Gln897Hisfs*23 |
| 4                 | Proximal hypospadias, triangular face, frontal bossa, middle face hypoplasia, enlarged filter, artiuclar foruxitude, hypospadias, and short stature                                                | Mulibrey nanism         | <i>TRIM37</i>  | c.1020delC               | p.Tyr341Ilefs*16                |

Table 3. Uncertain significance rare heterozygous variants in SGA children with proximal hypospadias

| Subject | Phenotype                                                                                                                                                | Gene         | Variants  | Protein      |
|---------|----------------------------------------------------------------------------------------------------------------------------------------------------------|--------------|-----------|--------------|
| 1       | Proximal hypospadias                                                                                                                                     | <i>WT1</i>   | c.1048T>C | p.Cys350Arg  |
| 2       | Proximal hypospadias, horizontal nystagmus, discrete epicanthus, broad nose base, umbilical and inguinal hernia, triangular face, weight gain difficulty | <i>IGF1R</i> | c.4009C>T | p.Arg1337Cys |
| 3       | Proximal hypospadias                                                                                                                                     | <i>BMP8B</i> | c.346C>T  | p.Arg116Cys  |
| 4       | Proximal hypospadias, micropenis and bilateral cryptorchidism                                                                                            | <i>DHX37</i> | c.2149G>A | p. Val717Ile |
|         |                                                                                                                                                          | <i>GATA4</i> | c.1220C>G | p.Pro407Arg  |
| 5       | Proximal hypospadias and bilateral cryptorchidism                                                                                                        | <i>DHX37</i> | c.2209G>A | p.Ala737Thr  |
|         |                                                                                                                                                          | <i>WWOX</i>  | c.253T>G  | p.Tyr85Asp   |
